# Supplementary material for: Importance of Ile71 in β-actin on histidine methyltransferase SETD3 catalysis
Source: Royal Society of Chemistry journal article supplement (doi:10.1039/d1ob02430b), 2022-01-01
Supplement: d1ob02430b1.pdf [file d1ob02430b1.pdf]

# Supplementary Information

## Importance of Ile71 in $\beta$ -actin on histidine methyltransferase SETD3 catalysis

Nurgül Bilgin,<sup>a</sup> Laust Moesgaard,<sup>a</sup> Marijn N. Maas,<sup>a</sup> Jordi C. J. Hintzen,<sup>a</sup> Apolonia  
Witecka,<sup>b</sup> Jakub Drozak,<sup>b</sup> Jacob Kongsted,<sup>a</sup> and Jasmin Mecinović\*<sup>a</sup>

<sup>a</sup> Department of Physics, Chemistry and Pharmacy, University of Southern Denmark, Campusvej 55,  
5230 Odense, Denmark

E-mail: mecinovic@sdu.dk

<sup>b</sup> Department of Metabolic Regulation, Faculty of Biology, University of Warsaw, Miecznikowa 1,  
02-096 Warsaw, Poland

## **Table of Contents**

|                                                |    |
|------------------------------------------------|----|
| 1. Characterisation of $\beta$ -actin peptides | 3  |
| 2. MALDI-TOF MS supporting figures             | 20 |
| 3. Kinetics analysis supporting figures        | 24 |
| 4. Docking supporting figures                  | 26 |
| 5. MD supporting figures                       | 27 |

## 1. Characterisation of $\beta$ -actin peptides

**Table S1** Overview of synthesized  $\beta$ A peptide sequences and their respective m/z values.

| <b>Names</b>      | <b>Sequences</b>                     | <b>m/z<br/>Calculated</b> | <b>m/z<br/>Found</b> |
|-------------------|--------------------------------------|---------------------------|----------------------|
| $\beta$ A (66-88) | TLKYPIEHGIVTNWDDMEKIWHH              | 2861.42                   | 2861.97              |
| $\beta$ A-Gly71   | TLKYPGEHGIVTNWDDMEKIWHH              | 2805.35                   | 2805.65              |
| $\beta$ A-Ala71   | TLKYPAEHGIVTNWDDMEKIWHH              | 2819.37                   | 2820.27              |
| $\beta$ A-Abu71   | TLKYPA <u>bu</u> EHGIVTNWDDMEKIWHH   | 2833.38                   | 2833.79              |
| $\beta$ A-Nva71   | TLKYPN <u>va</u> EHGIVTNWDDMEKIWHH   | 2847.40                   | 2848.39              |
| $\beta$ A-Nle71   | TLKYPN <u>le</u> EHGIVTNWDDMEKIWHH   | 2861.42                   | 2861.88              |
| $\beta$ A-Ahp71   | TLKYPA <u>hp</u> EHGIVTNWDDMEKIWHH   | 2875.43                   | 2875.76              |
| $\beta$ A-Aoc71   | TLKYPA <u>oc</u> EHGIVTNWDDMEKIWHH   | 2889.45                   | 2889.83              |
| $\beta$ A-Cha71   | TLKYP <u>Cha</u> EHGIVTNWDDMEKIWHH   | 2901.45                   | 2900.63              |
| $\beta$ A-Phe71   | TLKYPFEHGIVTNWDDMEKIWHH              | 2895.40                   | 2895.99              |
| $\beta$ A-Val71   | TLKYPVEHGIVTNWDDMEKIWHH              | 2847.40                   | 2847.59              |
| $\beta$ A-Leu71   | TLKYPLEHGIVTNWDDMEKIWHH              | 2861.42                   | 2861.73              |
| $\beta$ A-Dap71   | TLKYPD <u>ap</u> EHGIVTNWDDMEKIWHH   | 2834.38                   | 2834.66              |
| $\beta$ A-Dab71   | TLKYPD <u>ab</u> EHGIVTNWDDMEKIWHH   | 2848.39                   | 2848.66              |
| $\beta$ A-Dlle71  | TLKYPD- <u>lle</u> EHGIVTNWDDMEKIWHH | 2861.42                   | 2861.71              |
| $\beta$ A-hSer71  | TLKYPh <u>Ser</u> EHGIVTNWDDMEKIWHH  | 2849.38                   | 2849.50              |

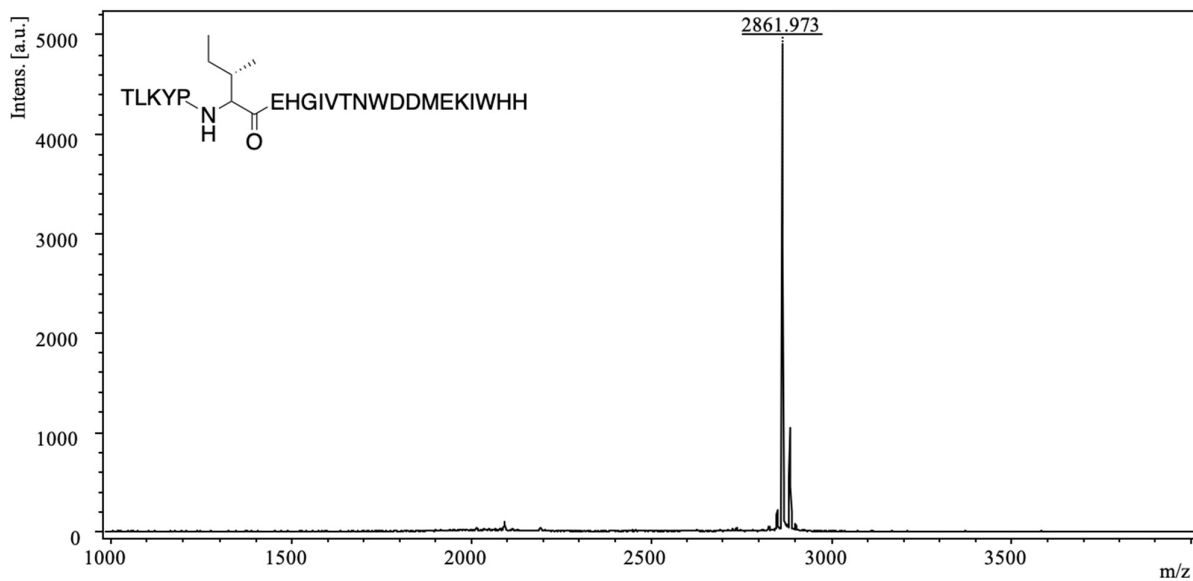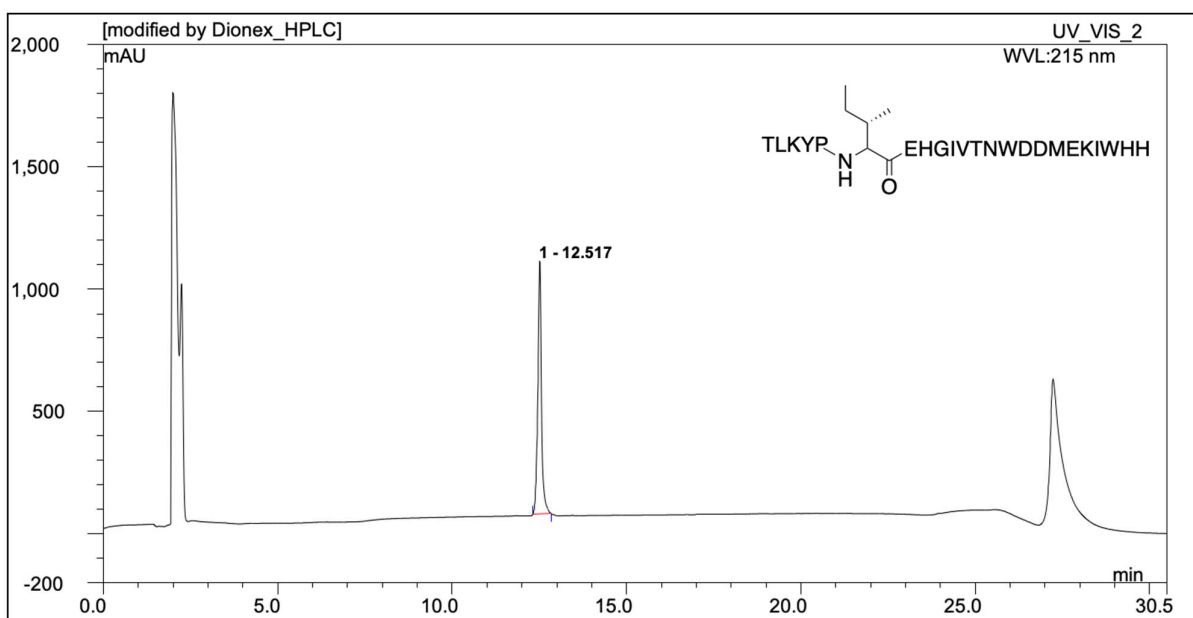

**Fig. S1** MALDI-TOF MS data (top) calc.  $m/z$  2861.4 and found  $m/z$  2862.0. Analytical HPLC of the  $\beta$ A-Ile71 peptide after RP-HPLC purification (bottom). Peptide elutes at 12.52 min.

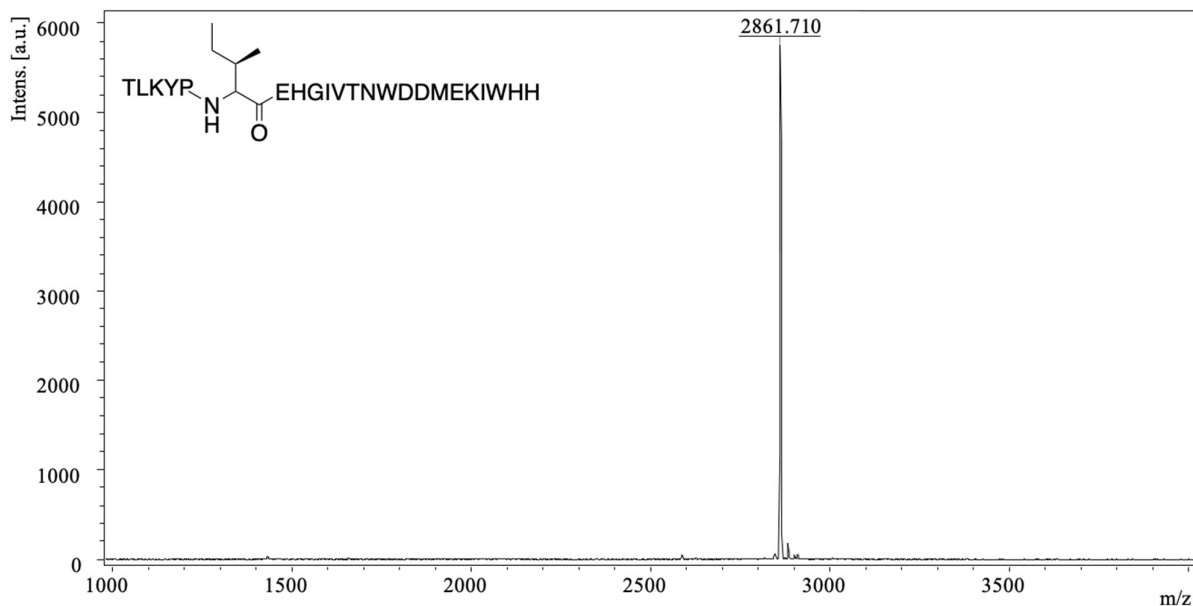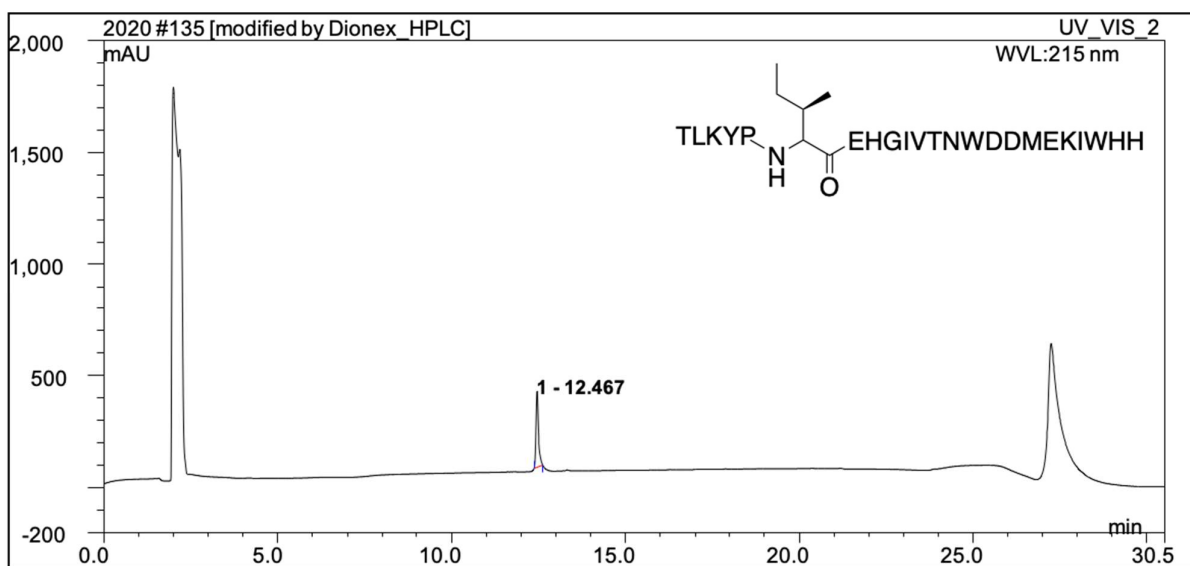

**Fig. S2** MALDI-TOF MS data (top) calc.  $m/z$  2861.4 and found  $m/z$  2861.7. Analytical HPLC of the  $\beta$ A-DIle71 peptide after RP-HPLC purification (bottom). Peptide elutes at 12.47 min.

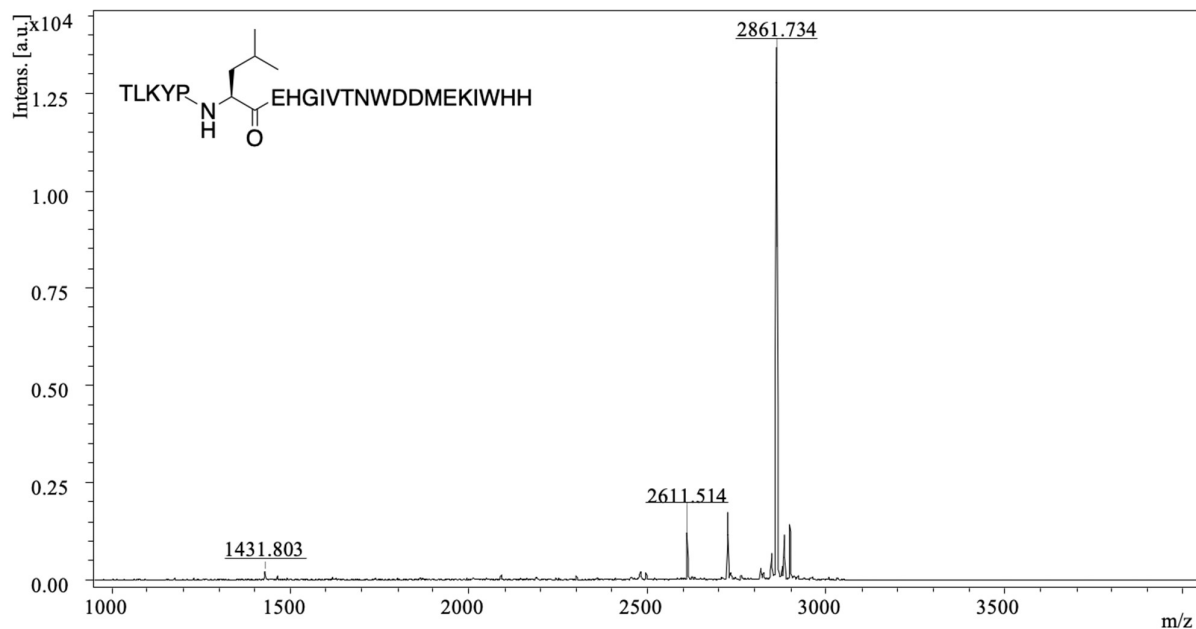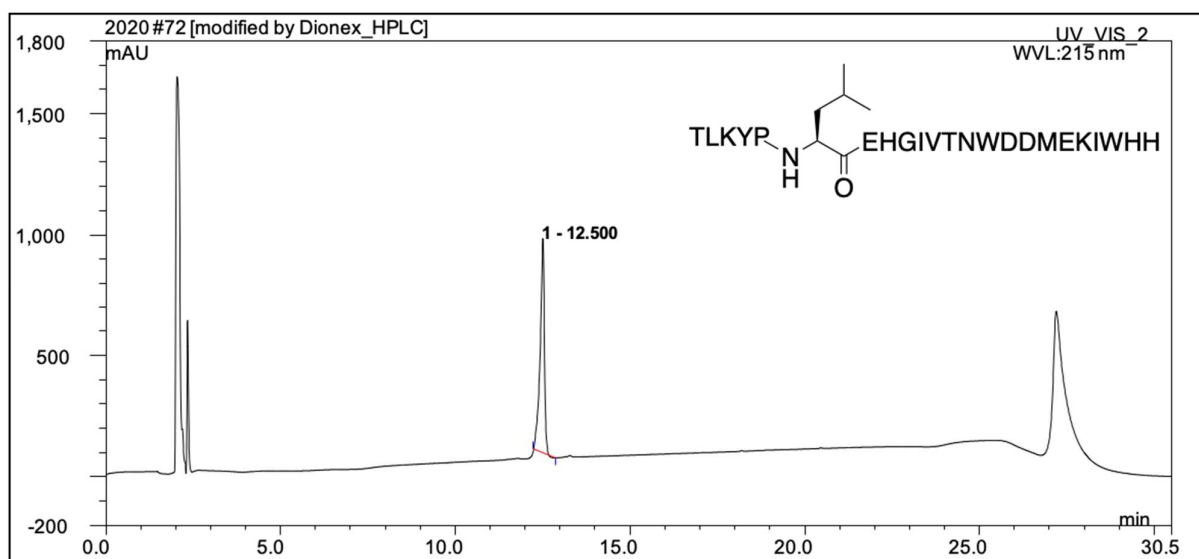

**Fig. S3** MALDI-TOF MS data (top) calc.  $m/z$  2861.4 and found  $m/z$  2861.7. Analytical HPLC of the  $\beta$ A-Leu71 peptide after RP-HPLC purification (bottom). Peptide elutes at 12.5 min.

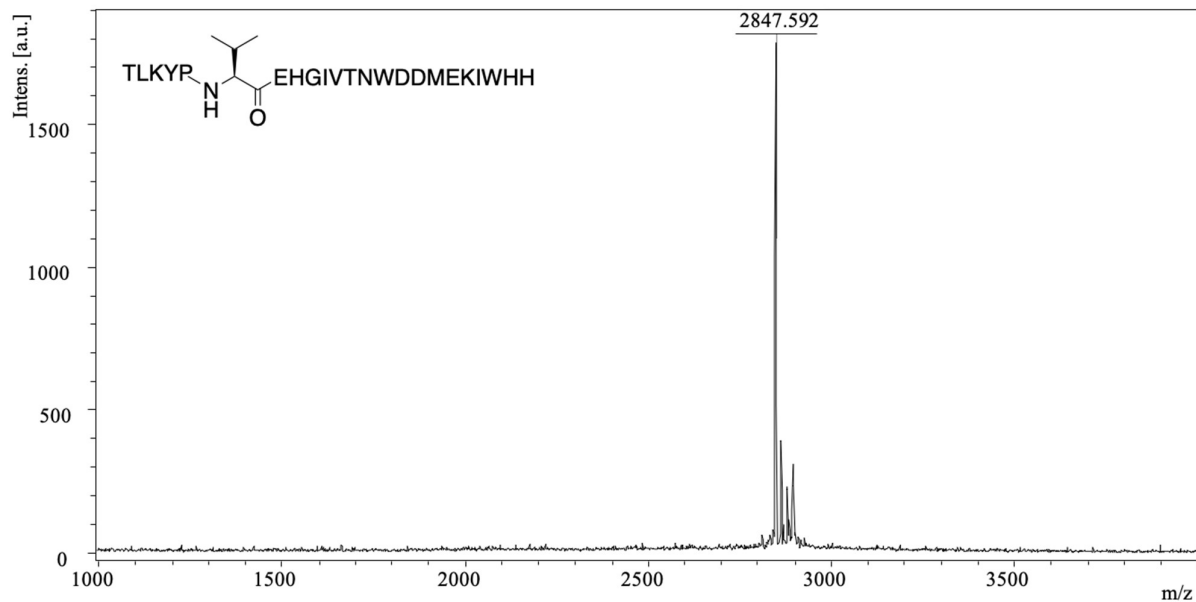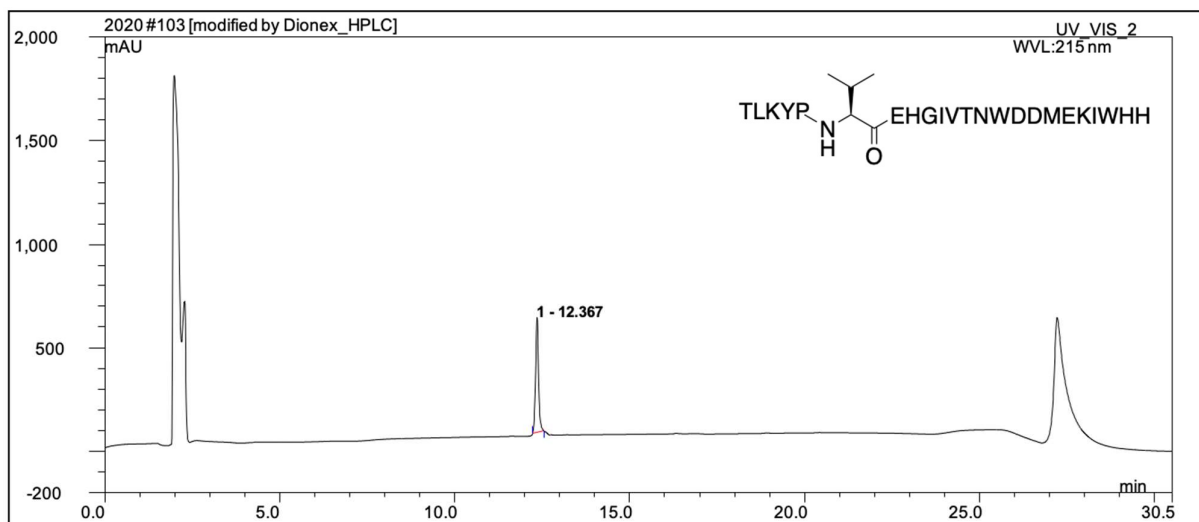

**Fig. S4** MALDI-TOF MS data (top) calc.  $m/z$  2847.4 and found  $m/z$  2847.6. Analytical HPLC of the  $\beta$ A-Val71 peptide after RP-HPLC purification (bottom). Peptide elutes at 12.37 min.

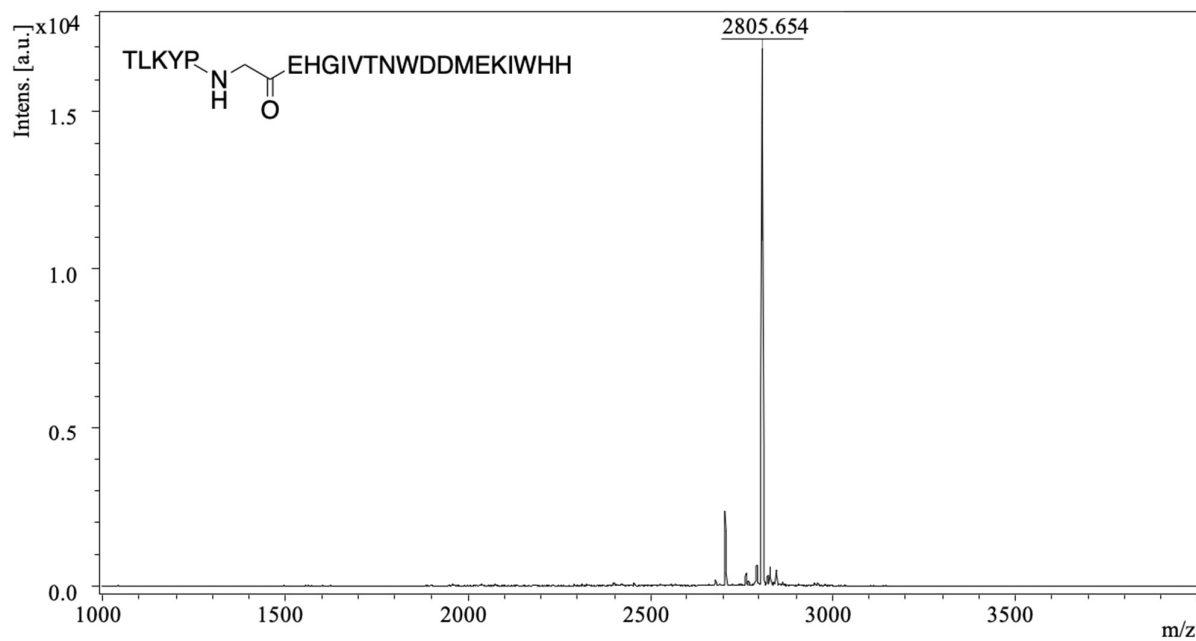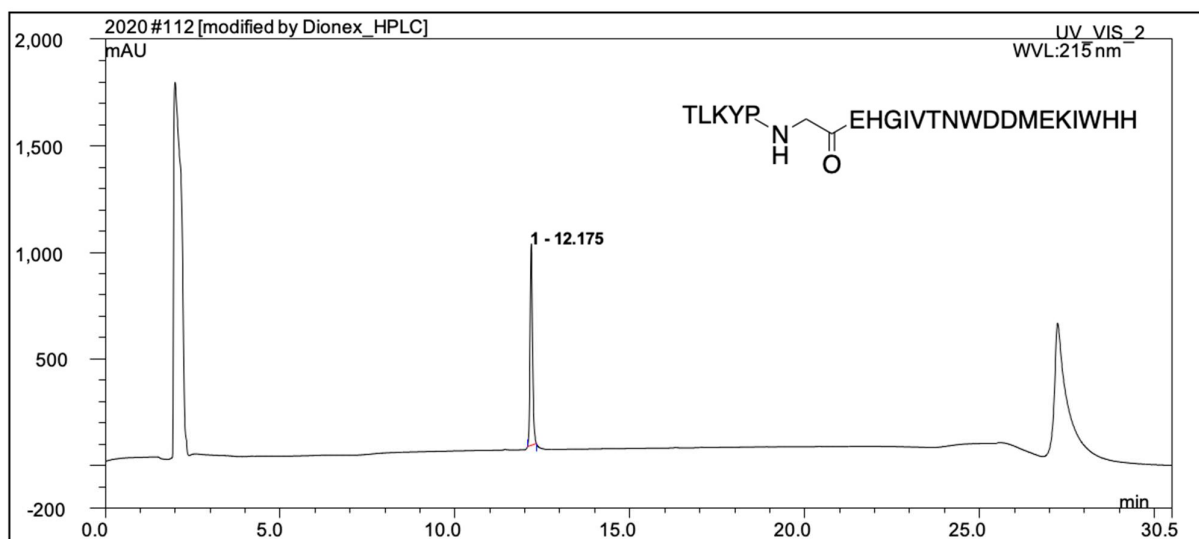

**Fig. S5** MALDI-TOF MS data (top) calc.  $m/z$  2805.4 and found  $m/z$  2805.7. Analytical HPLC of the  $\beta$ A-Gly71 peptide after RP-HPLC purification (bottom). Peptide elutes at 12.18 min.



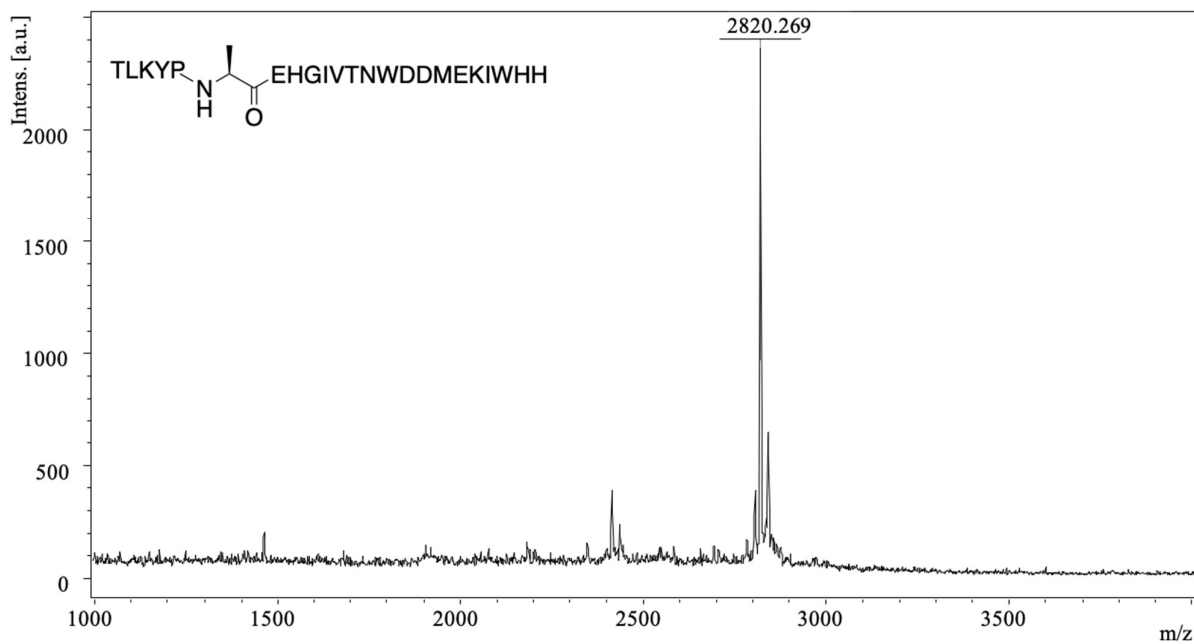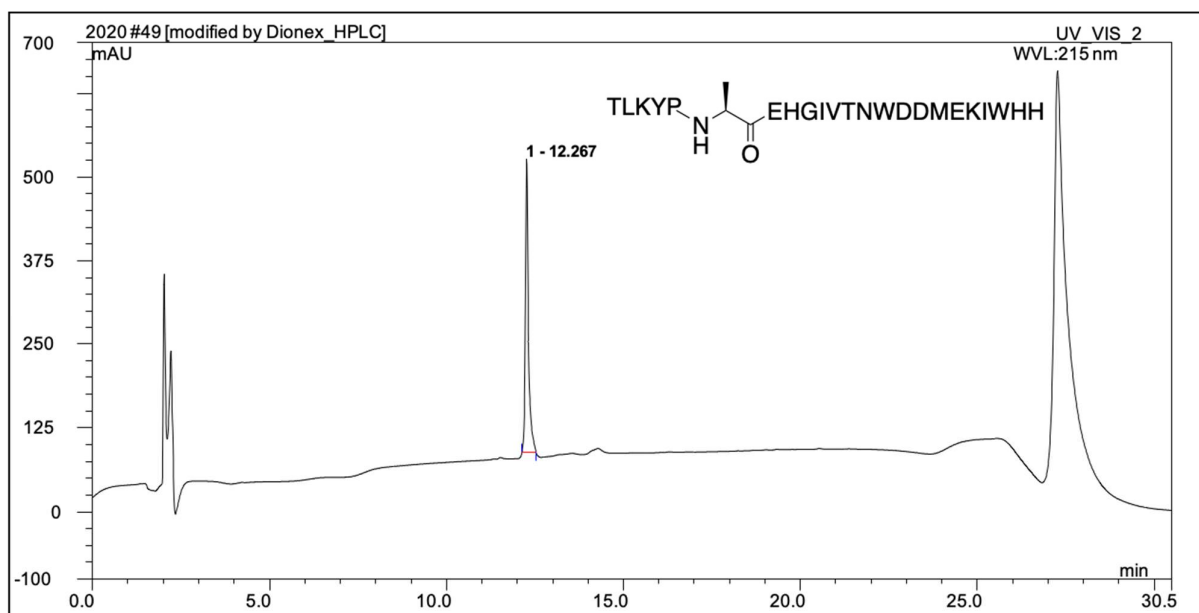

**Fig. S6** MALDI-TOF MS data (top) calc.  $m/z$  2820.4 and found  $m/z$  2820.3. Analytical HPLC of the  $\beta$ A-Ala71 peptide after RP-HPLC purification (bottom). Peptide elutes at 12.27 min.

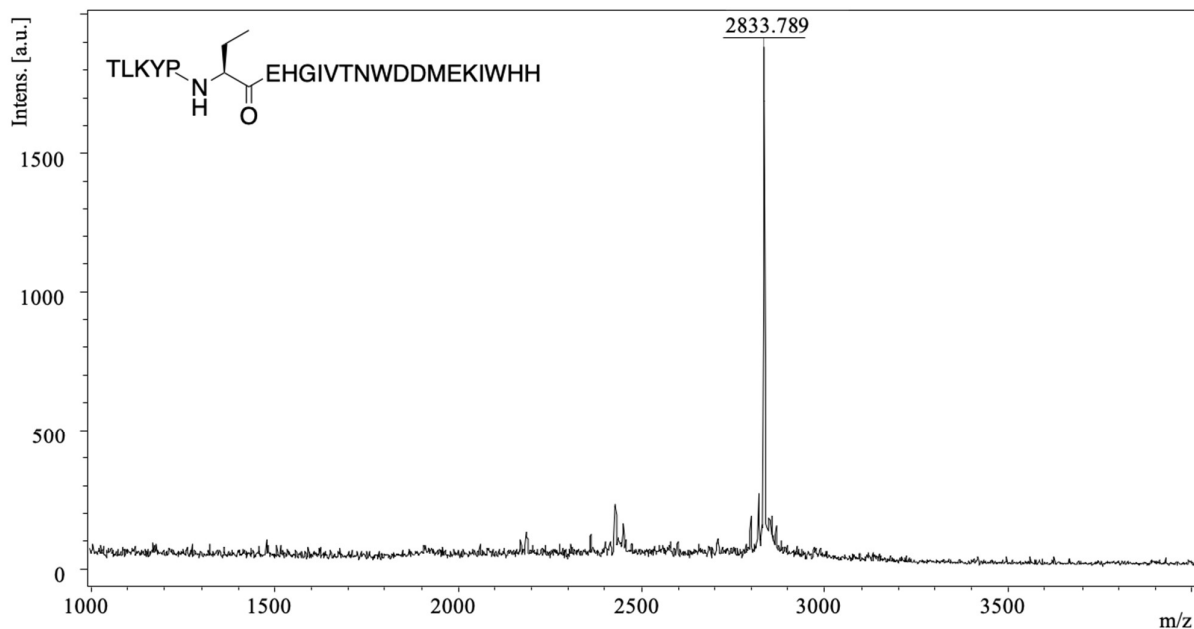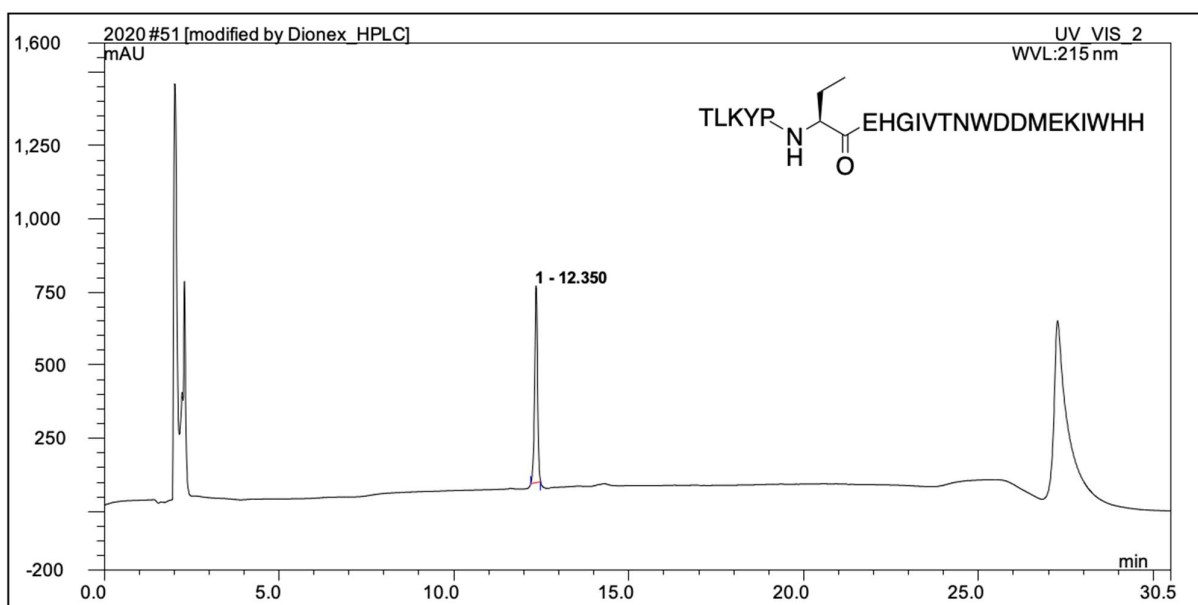

**Fig. S7** MALDI-TOF MS data (top) calc.  $m/z$  2833.4 and found  $m/z$  2833.8. Analytical HPLC of the  $\beta$ A-  
Abu71 peptide after RP-HPLC purification (bottom). Peptide elutes at 12.35 min.

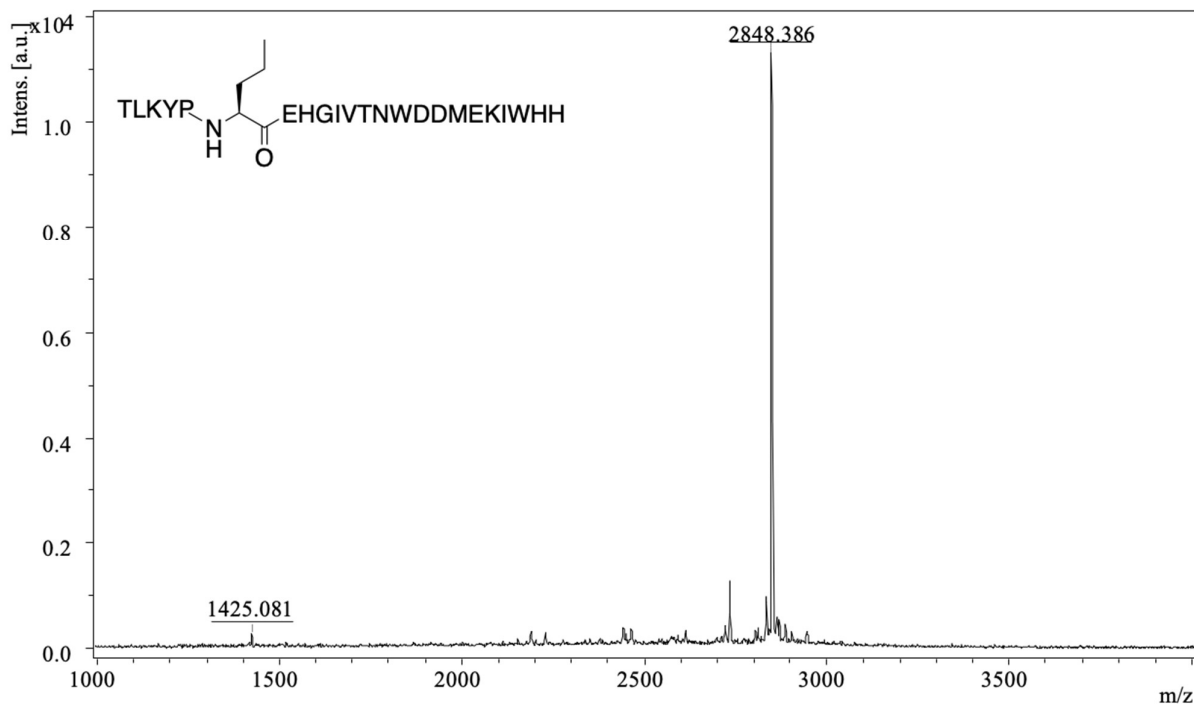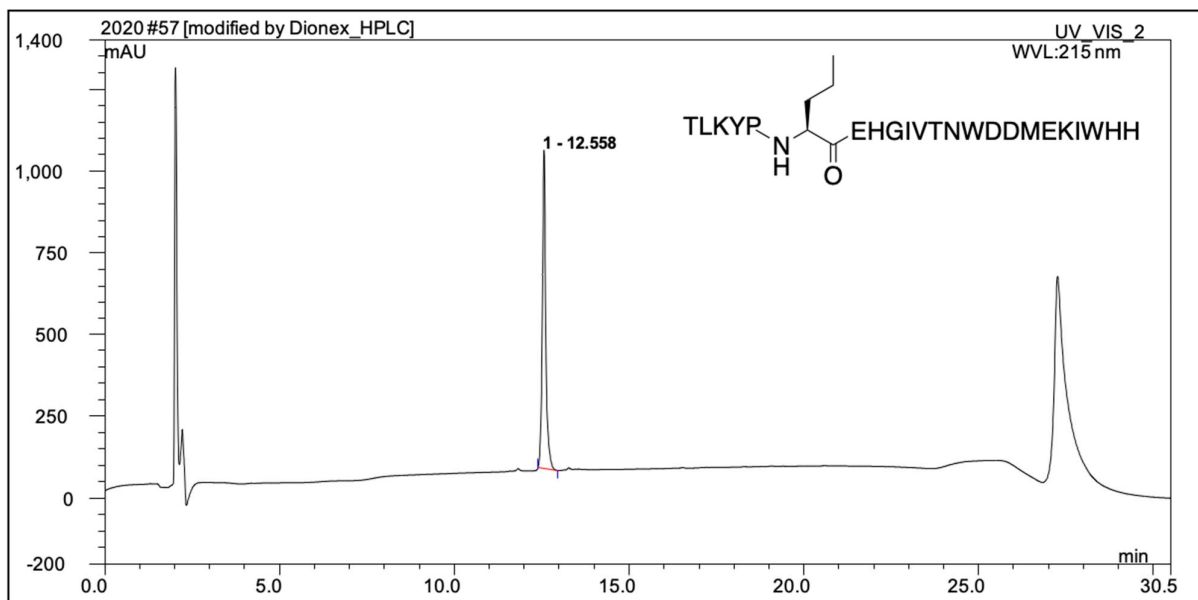

**Fig. S8** MALDI-TOF MS data (top) calc.  $m/z$  2847.4 found  $m/z$  2848.4. Analytical HPLC of the  $\beta$ A-Nva71 peptide after RP-HPLC purification (bottom). Peptide elutes at 12.56 min.

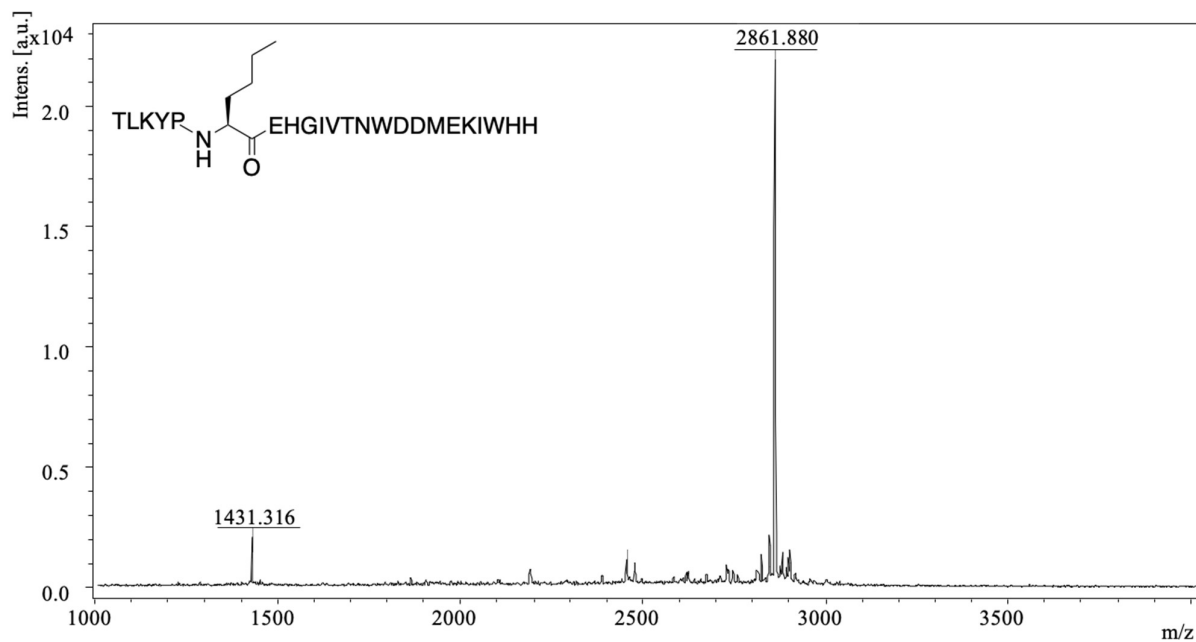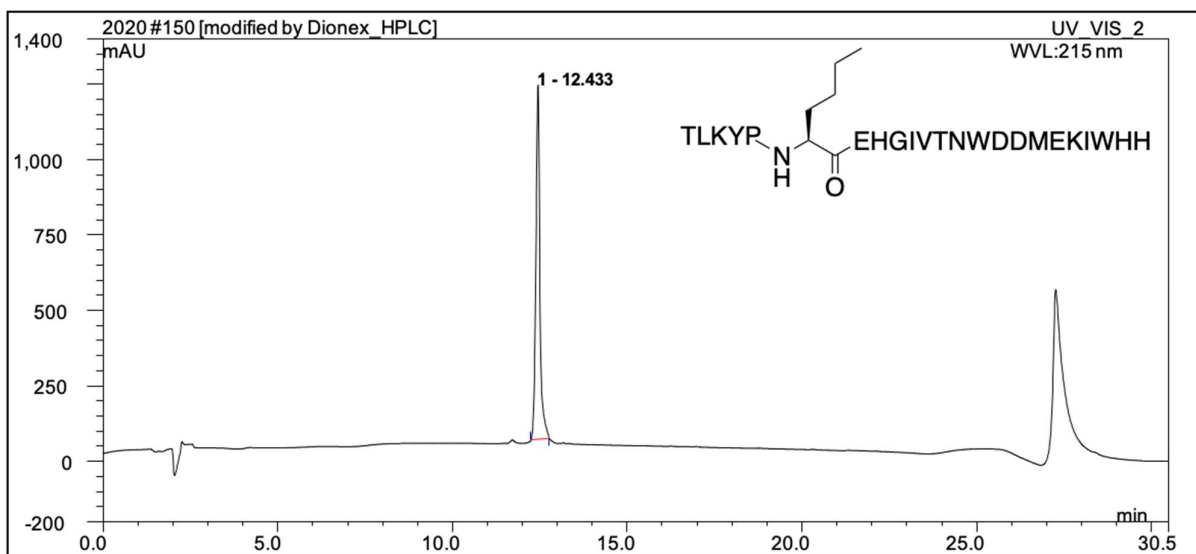

**Fig. S9** MALDI-TOF MS data (top) calc.  $m/z$  2861.4 and found  $m/z$  2861.9. Analytical HPLC of the  $\beta$ A-Nle71 peptide after RP-HPLC purification (bottom). Peptide elutes at 12.43 min.

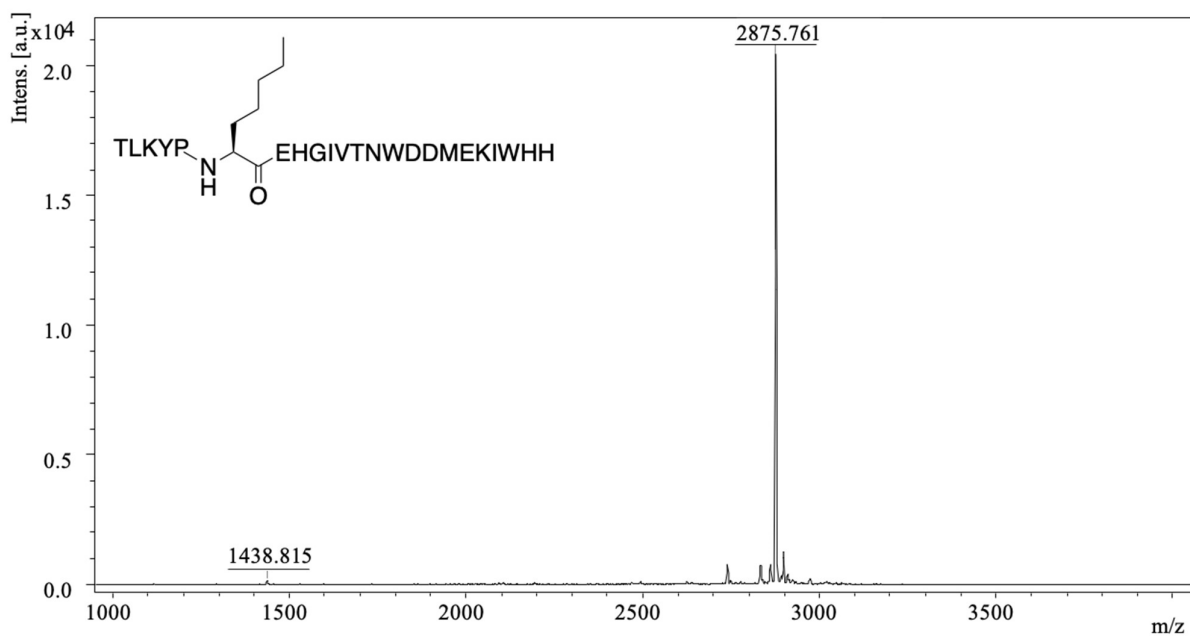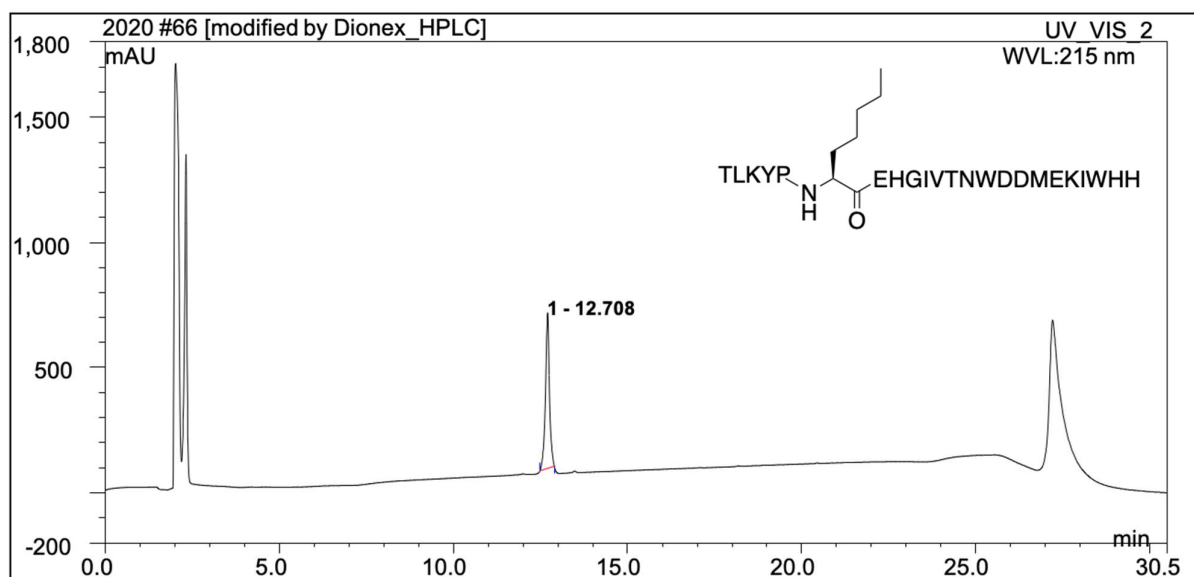

**Fig. S10** MALDI-TOF MS data (top) calc.  $m/z$  2875.4 and found  $m/z$  2875.8. Analytical HPLC of the  $\beta$ A-Ahp71 peptide after RP-HPLC purification (bottom). Peptide elutes at 12.71 min.

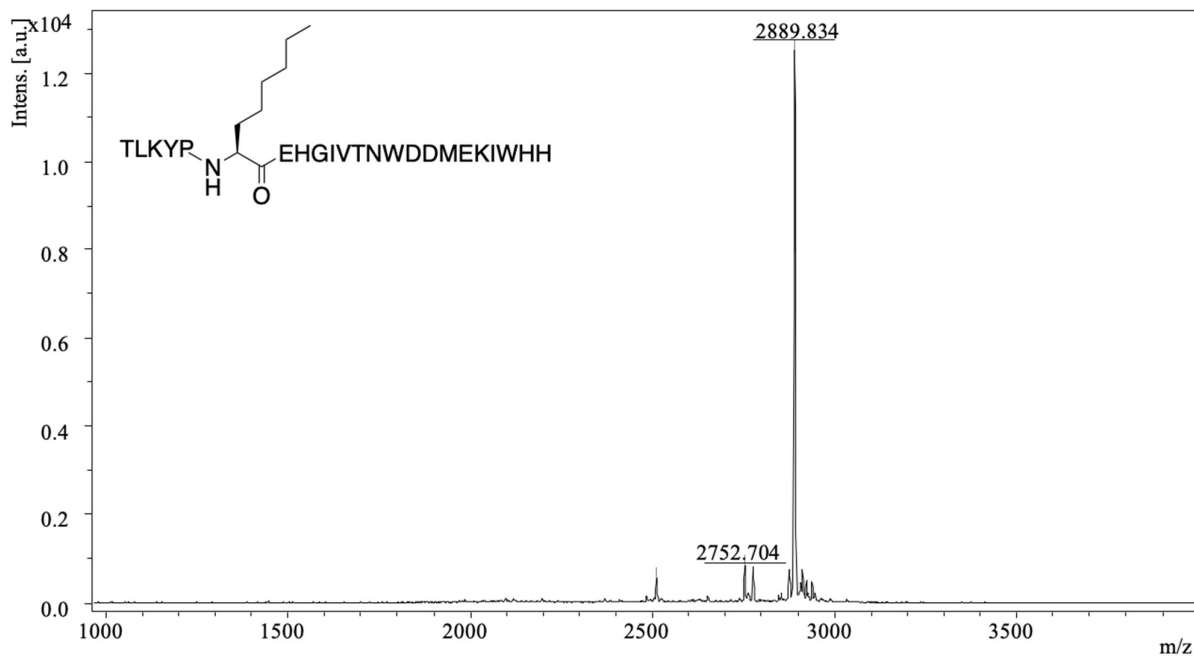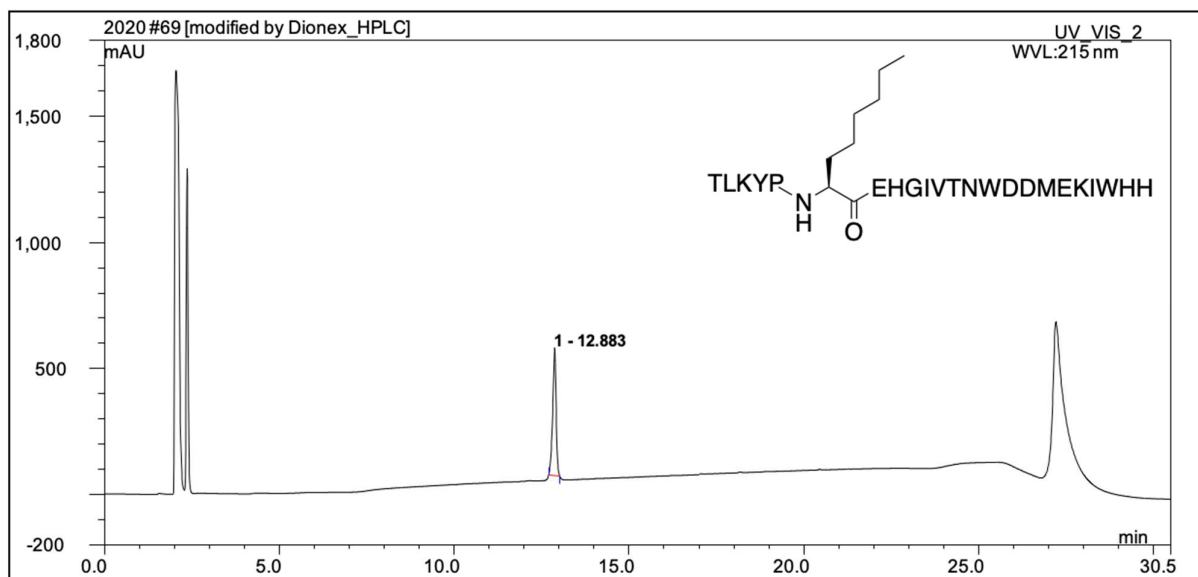

**Fig. S11** MALDI-TOF MS data (top) calc.  $m/z$  2889.5 and found  $m/z$  2889.8. Analytical HPLC of the  $\beta$ A-Aoc71 peptide after RP-HPLC purification (bottom). Peptide elutes at 12.88 min.

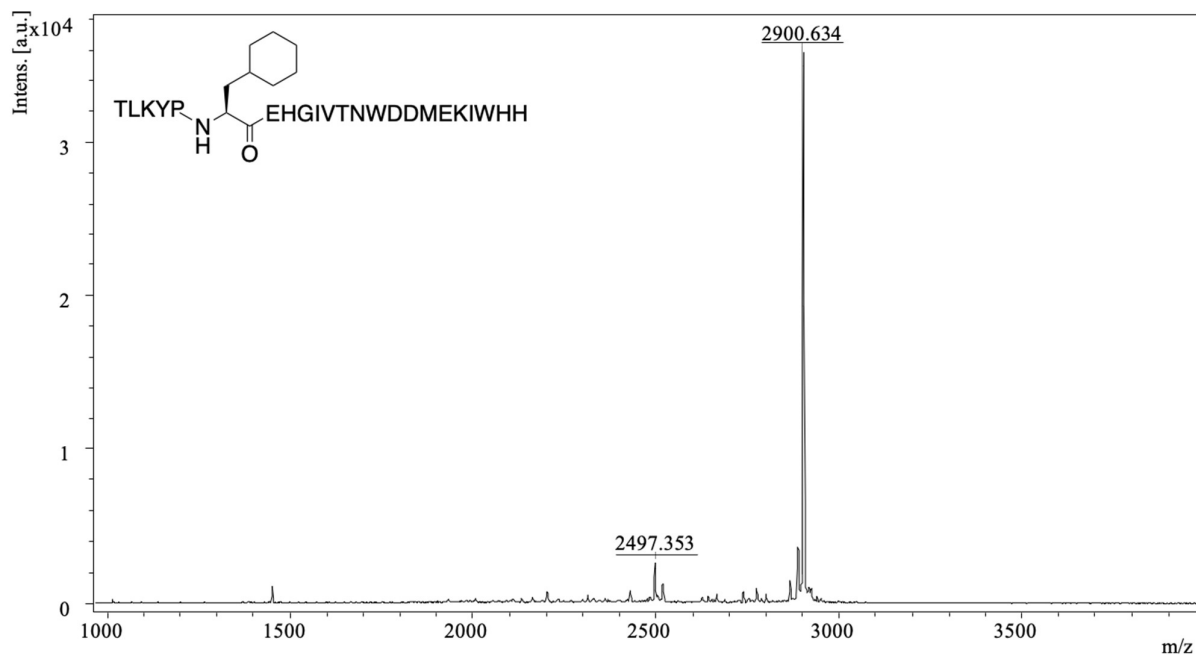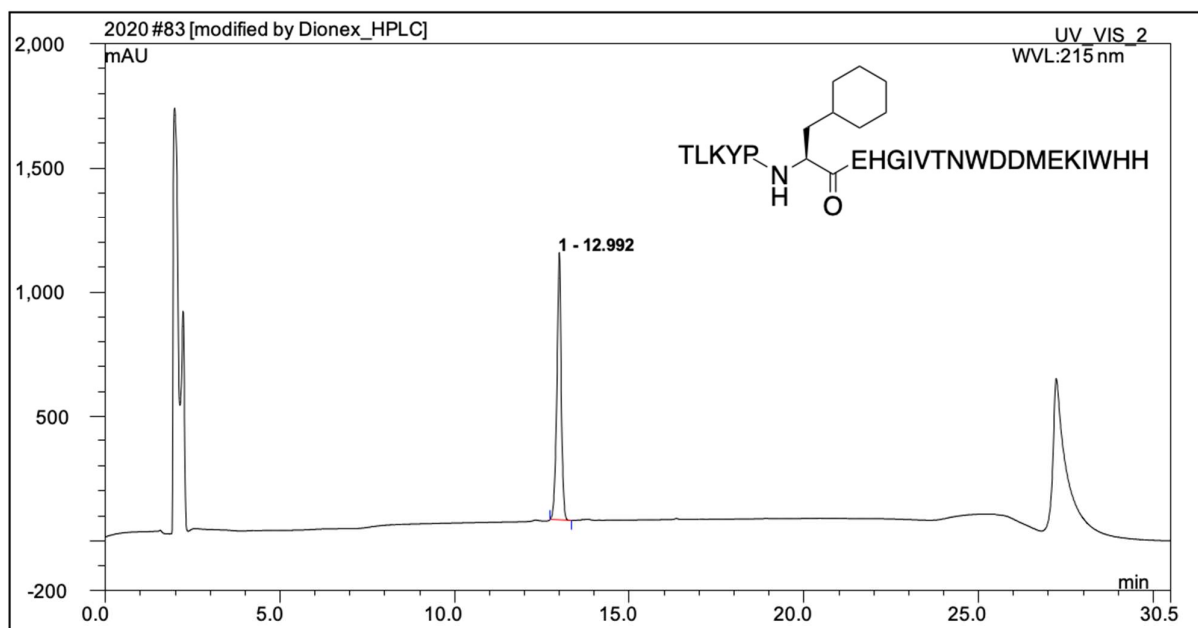

**Fig. S12** MALDI-TOF MS data (top) calc.  $m/z$  2901.5 and found  $m/z$  2901.6. Analytical HPLC of the  $\beta$ A-Cha71 peptide after RP-HPLC purification (bottom). Peptide elutes at 12.99 min.

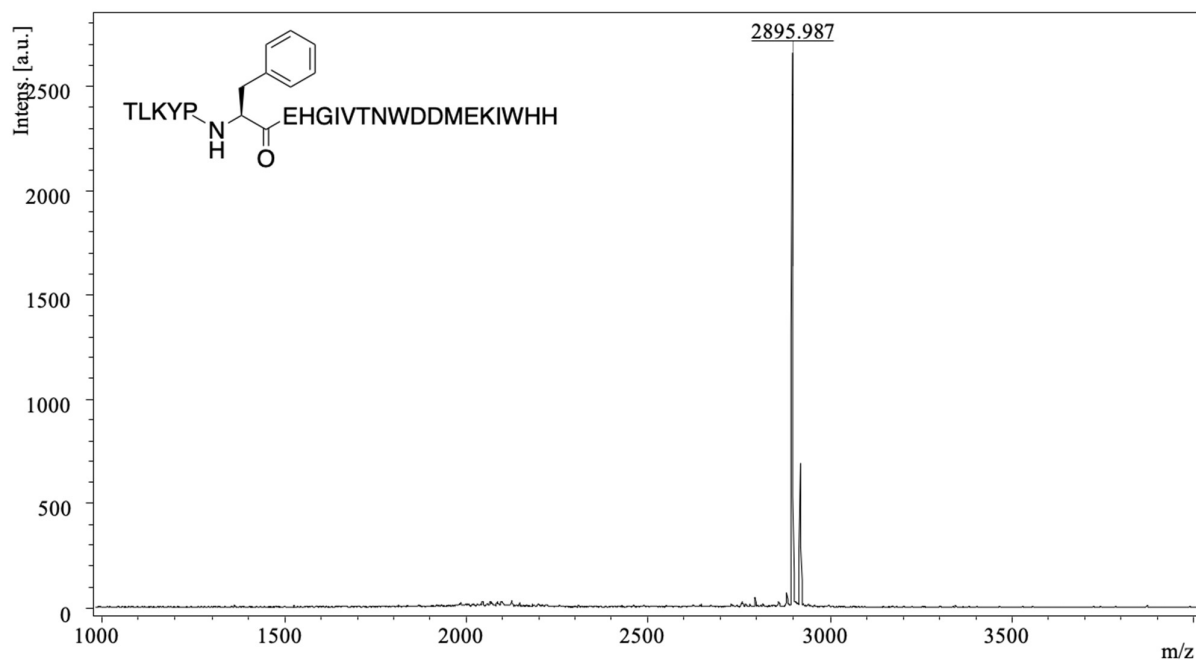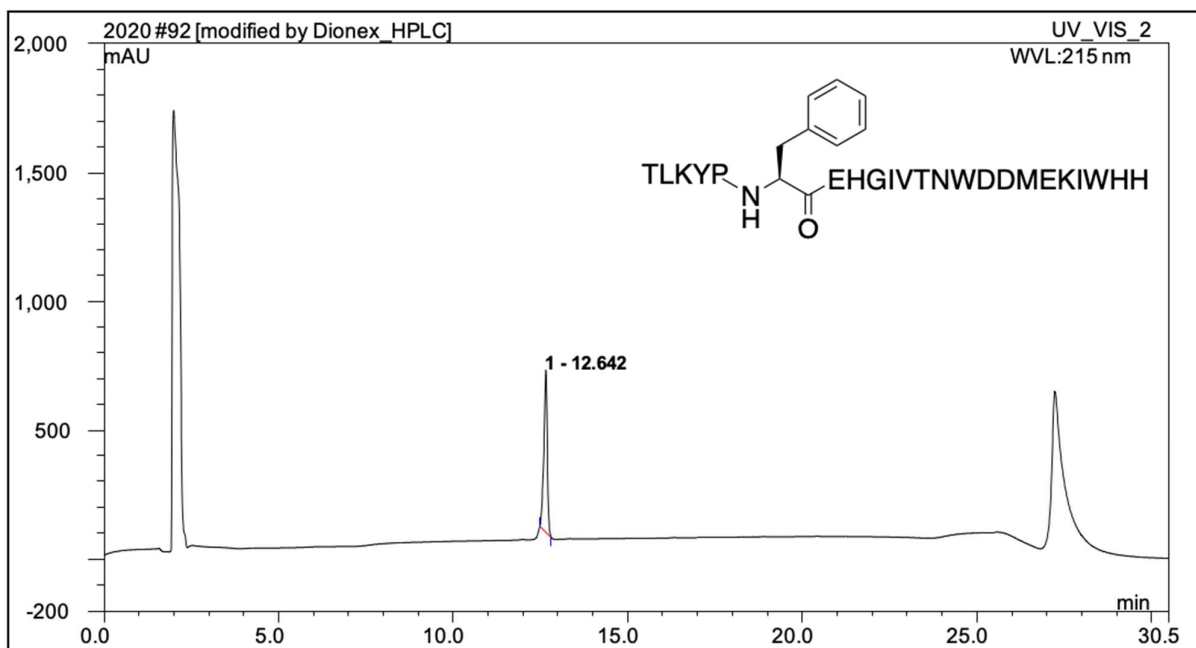

**Fig. S13** MALDI-TOF MS data (top) calc.  $m/z$  2895.4 and found  $m/z$  2896.0. Analytical HPLC of the  $\beta$ A-Phe71 peptide after RP-HPLC purification (bottom). Peptide elutes at 12.64 min.



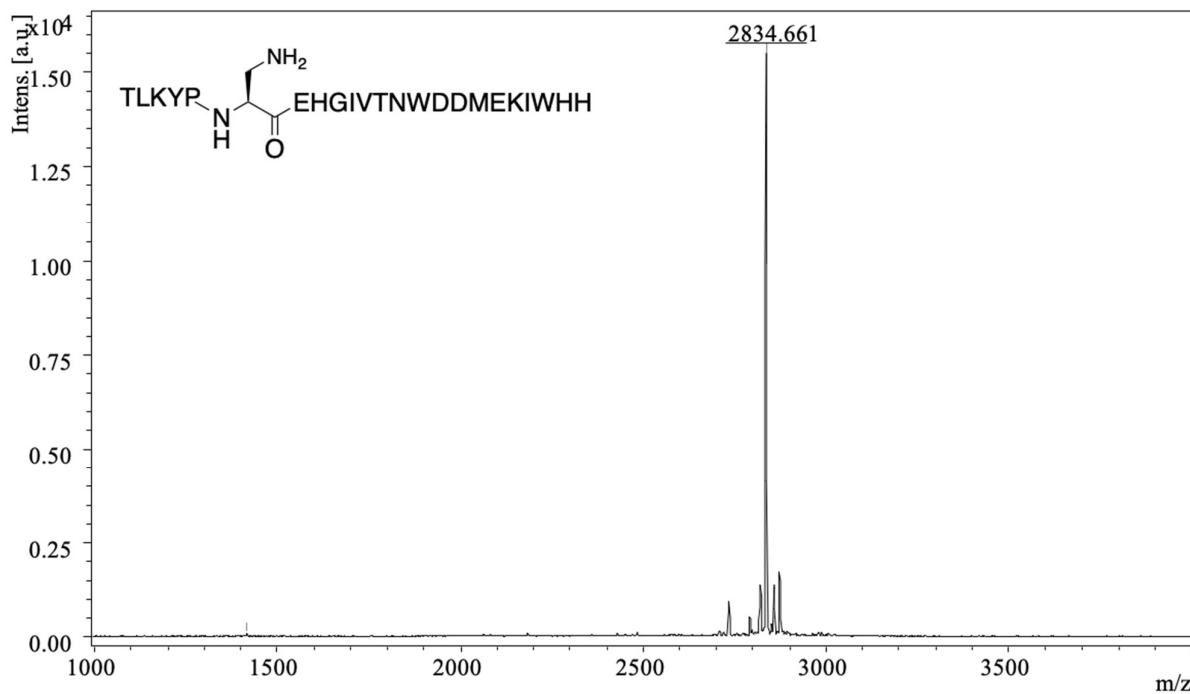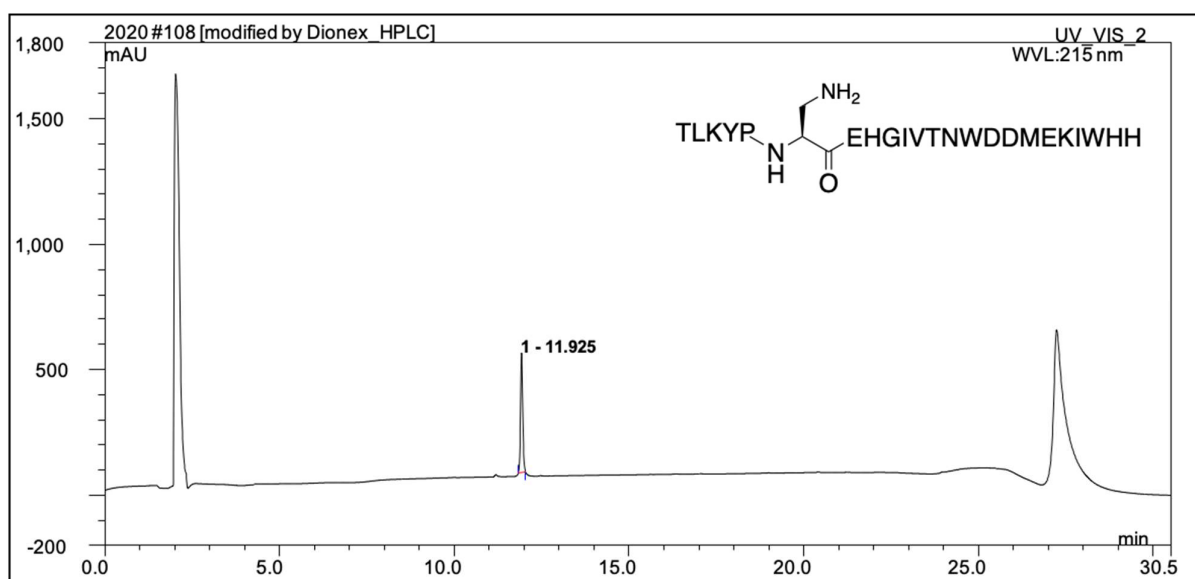

**Fig. S14** MALDI-TOF MS data (top) calc.  $m/z$  2834.4 and found  $m/z$  2834.7. Analytical HPLC of the  $\beta$ A-Dap71 peptide after RP-HPLC purification (bottom). Peptide elutes at 11.93 min.

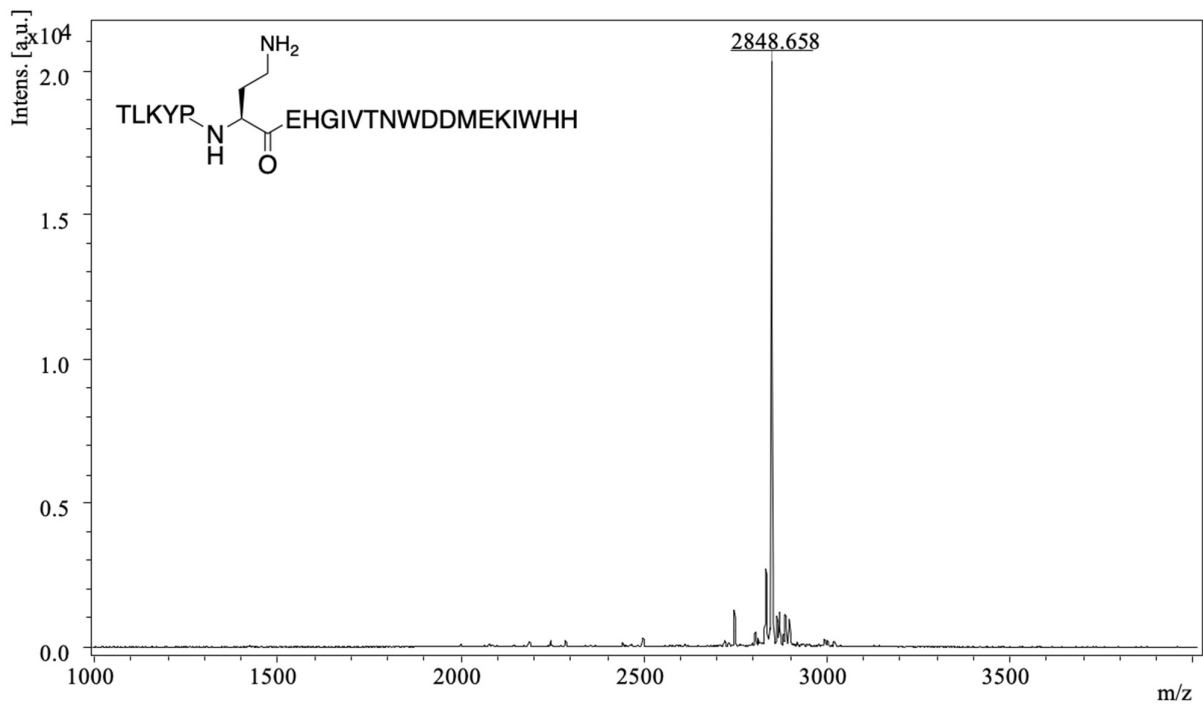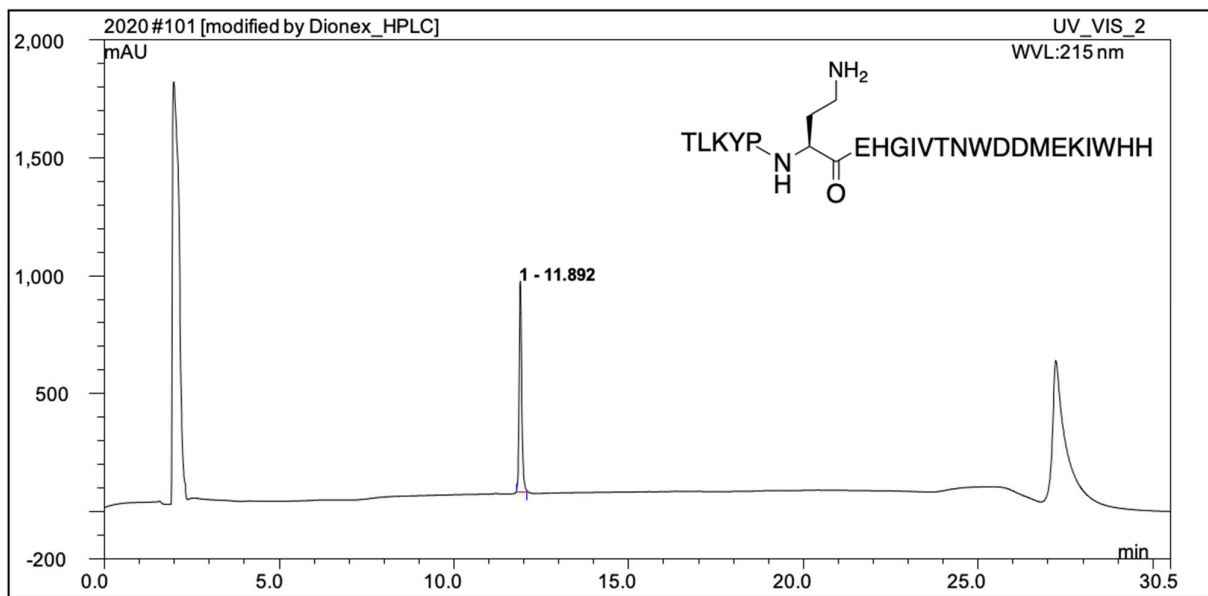

**Fig. S15** MALDI-TOF MS data (top) calc.  $m/z$  2848.4 and found  $m/z$  2848.7. Analytical HPLC of the  $\beta$ A-Dab71 peptide after RP-HPLC purification (bottom). Peptide elutes at 11.89 min.

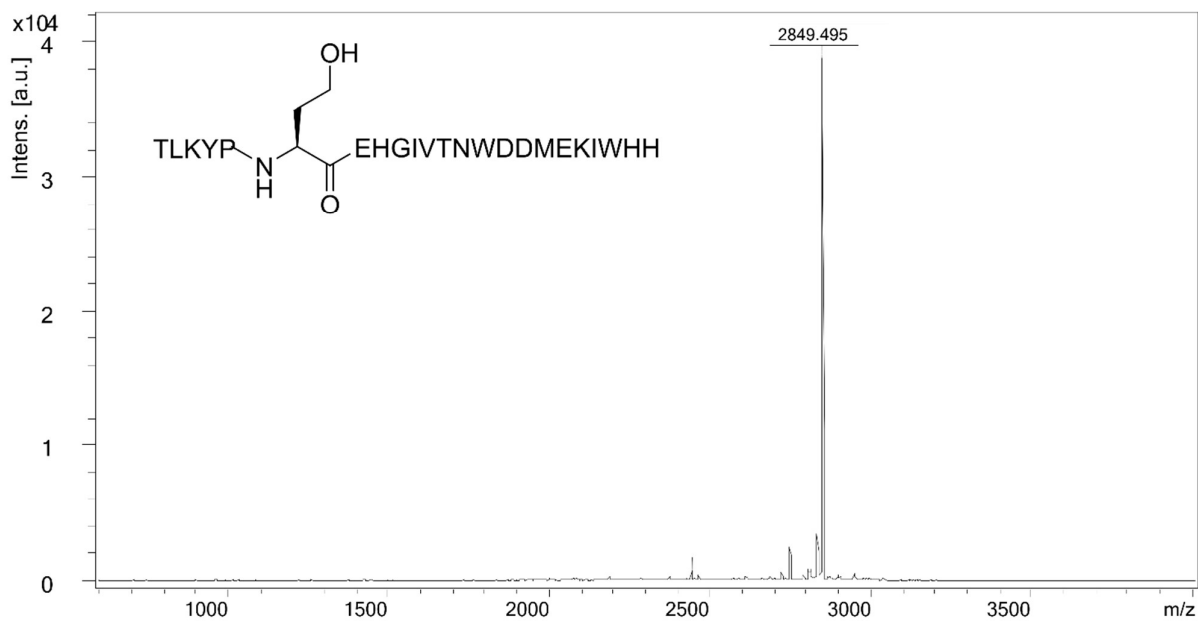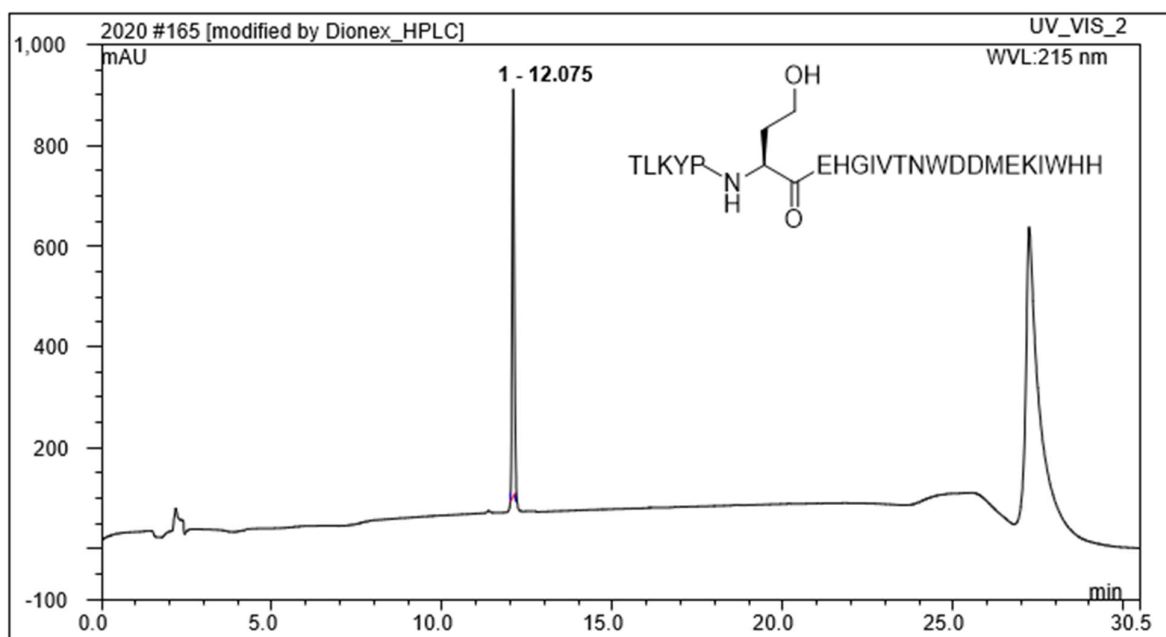

**Fig. S16** MALDI-TOF MS data (top) calc.  $m/z$  2849.4 and found  $m/z$  2849.5. Analytical HPLC of the  $\beta$ A-hSer71 peptide after RP-HPLC purification (bottom). Peptide elutes at 12.08 min.

## 2. MALDI-TOF MS supporting figures

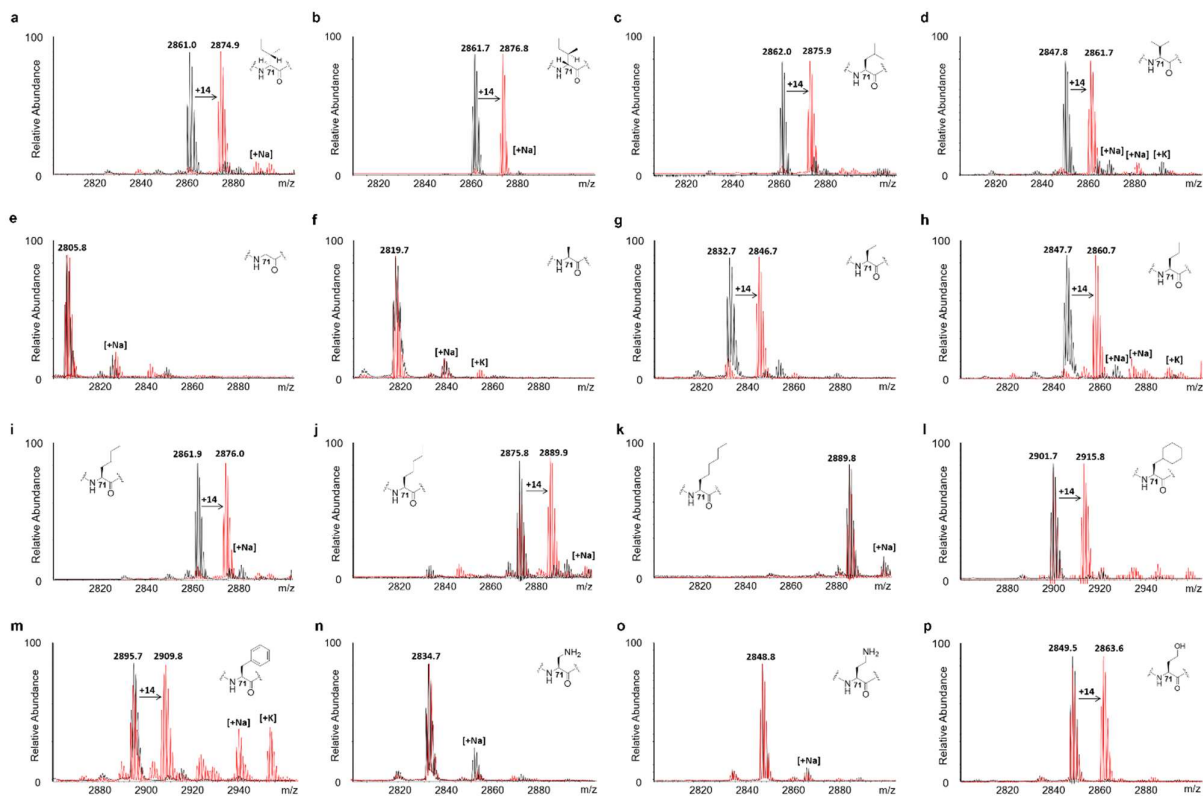

**Fig. S17** MALDI-TOF MS data showing SETD3-catalysed (1  $\mu$ M) methylation of  $\beta$ A peptides (10  $\mu$ M) in the presence of SAM (100  $\mu$ M) after 1 h at 37  $^{\circ}$ C, pH 9. Control reactions in the absence of SETD3 are shown in black, whereas SETD3-catalysed reactions are shown in red. **a)**  $\beta$ A-Ile71, **b)**  $\beta$ A-DIle71, **c)**  $\beta$ A-Leu71, **d)**  $\beta$ A-Val71, **e)**  $\beta$ A-Gly71, **f)**  $\beta$ A-Ala71 **g)**  $\beta$ A-Abu71, **h)**  $\beta$ A-Nva71, **i)**  $\beta$ A-Nle71, **j)**  $\beta$ A-Ahp71, **k)**  $\beta$ A-Aoc71, **l)**  $\beta$ A-Cha71, **m)**  $\beta$ A-Phe71, **n)**  $\beta$ A-Dap71, **o)**  $\beta$ A-Dab71, **p)**  $\beta$ A-hSer71.

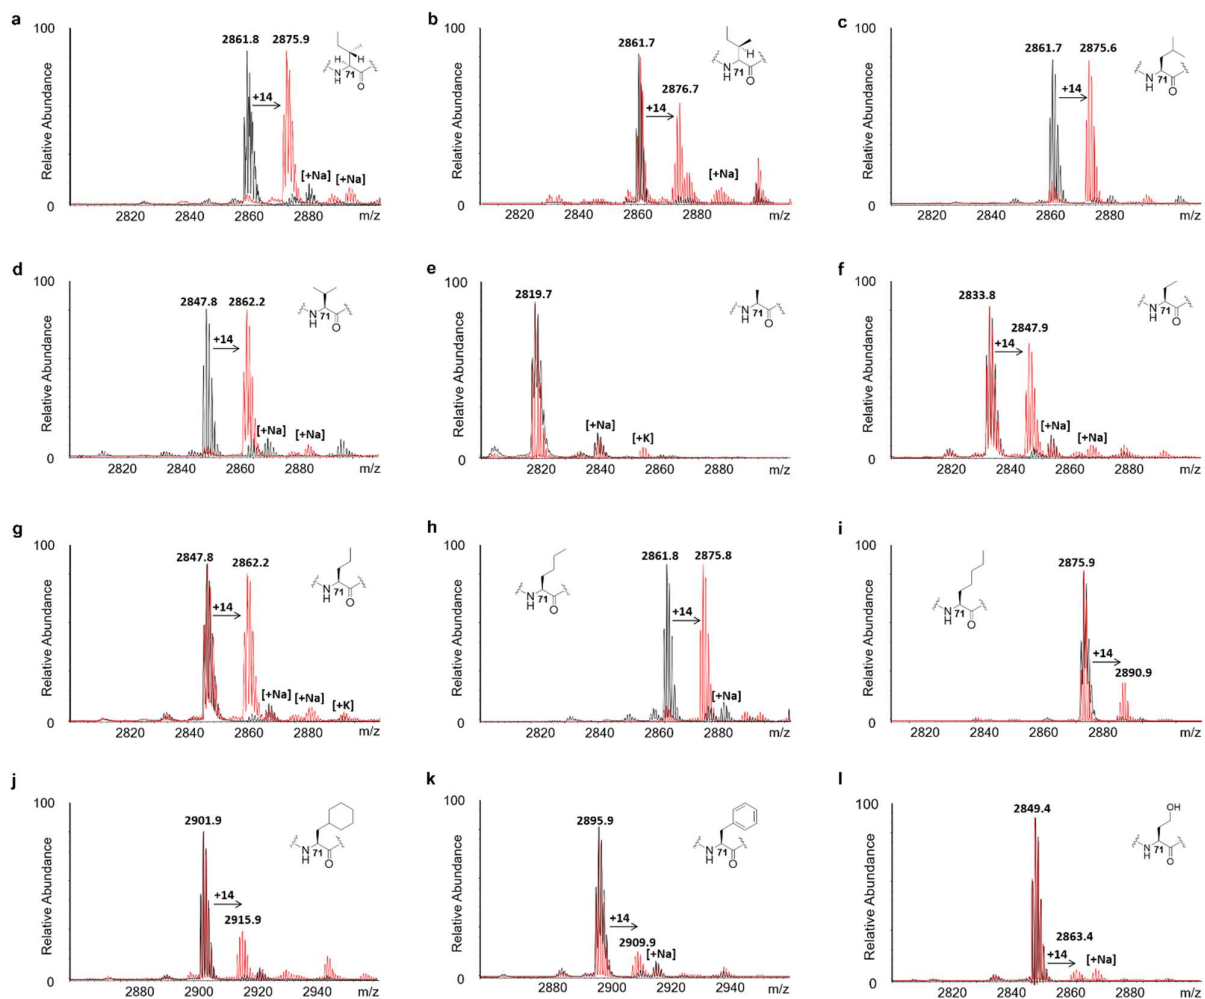

**Fig. S18** MALDI-TOF MS data showing SETD3-catalysed (200 nM) methylation of  $\beta\alpha$  peptides (10  $\mu\text{M}$ ) in the presence of SAM (100  $\mu\text{M}$ ) after 1 h at 37  $^{\circ}\text{C}$ , pH 9. Control reactions in the absence of SETD3 are shown in black, whereas SETD3-catalysed reactions are shown in red. **a)**  $\beta\alpha$ -Ile71, **b)**  $\beta\alpha$ -DIle71, **c)**  $\beta\alpha$ -Leu71, **d)**  $\beta\alpha$ -Val71, **e)**  $\beta\alpha$ -Ala71, **f)**  $\beta\alpha$ -Abu71 **g)**  $\beta\alpha$ -Nva71, **h)**  $\beta\alpha$ -NIle71, **i)**  $\beta\alpha$ -Ahp71, **j)**  $\beta\alpha$ -Cha71, **k)**  $\beta\alpha$ -Phe71, **l)**  $\beta\alpha$ -hSer71.

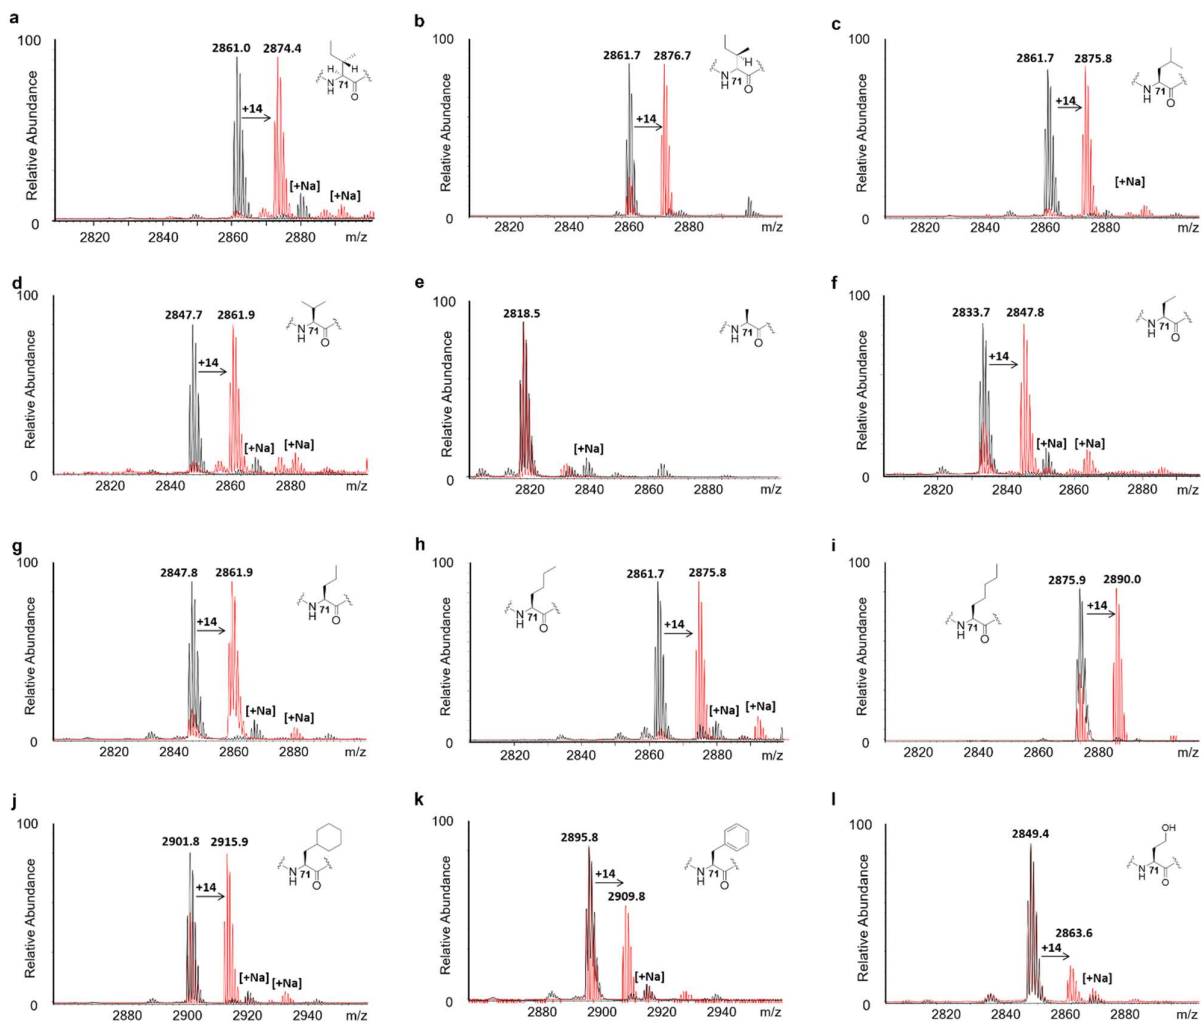

**Fig. S19** MALDI-TOF MS data showing SETD3-catalysed (200 nM) methylation of  $\beta\alpha$  peptides (10  $\mu$ M) in the presence of SAM (100  $\mu$ M) after 3 h at 37  $^{\circ}$ C, pH 9 (**a-l**). Control reactions in the absence of SETD3 are shown in black, whereas SETD3-catalysed reactions are shown in red. **a**)  $\beta\alpha$ -Ile71, **b**)  $\beta\alpha$ -DIle71, **c**)  $\beta\alpha$ -Leu71, **d**)  $\beta\alpha$ -Val71, **e**)  $\beta\alpha$ -Ala71, **f**)  $\beta\alpha$ -Abu71 **g**)  $\beta\alpha$ -Nva71, **h**)  $\beta\alpha$ -NIle71, **i**)  $\beta\alpha$ -Ahp71, **j**)  $\beta\alpha$ -Cha71, **k**)  $\beta\alpha$ -Phe71, **l**)  $\beta\alpha$ -hSer71.

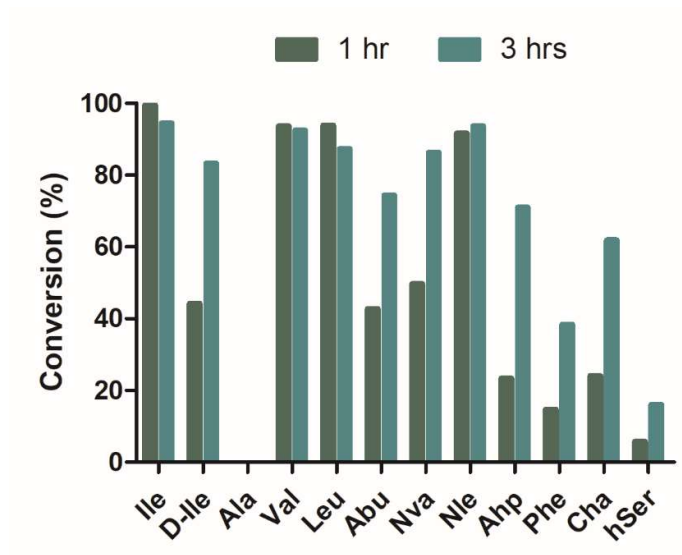

**Fig. S20** Data showing percentage methylation of all  $\beta$ A peptides (10  $\mu$ M) in the presence of 200 nM SETD3 and 100  $\mu$ M SAM after 1 and 3 h.

### 3. Kinetics analysis supporting figures

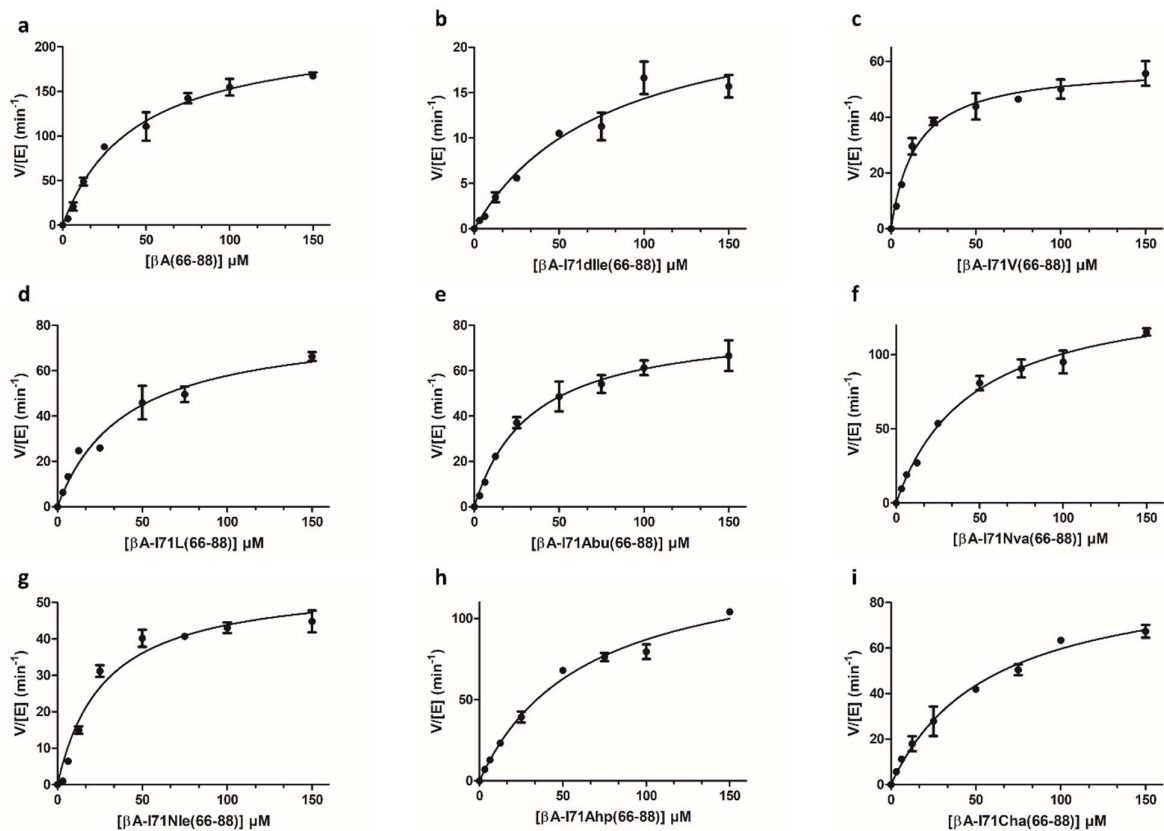

**Fig. S21** MALDI-TOF MS kinetics analysis of SETD3-catalysed methylation of  $\beta$ -actin peptides containing isoleucine and isoleucine analogues at position 71. Michaelis-Menten plots of **a)**  $\beta\text{-A-Ile71}$ , **b)**  $\beta\text{-A-D-Ile71}$ , **c)**  $\beta\text{-A-Val71}$ , **d)**  $\beta\text{-A-Leu71}$ , **e)**  $\beta\text{-A-Abu71}$ , **f)**  $\beta\text{-A-Nva71}$ , **g)**  $\beta\text{-A-Nle71}$ , **h)**  $\beta\text{-A-Ahp71}$ , **i)**  $\beta\text{-A-Cha71}$ .



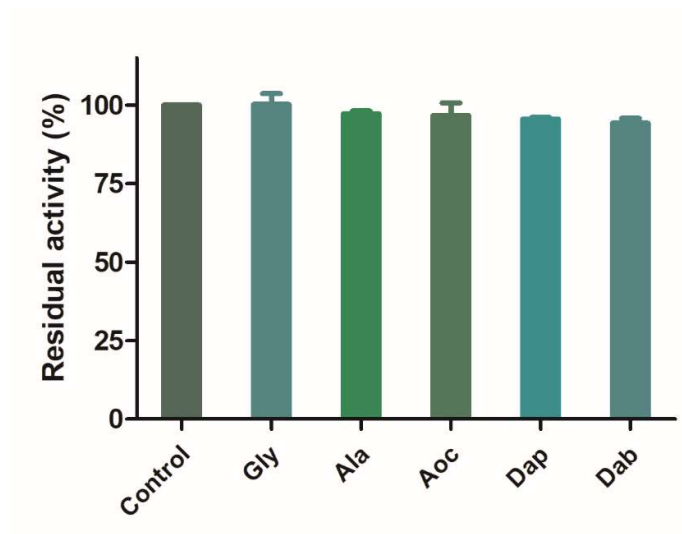

**Fig. S22** A single point inhibition of human SETD3 (360 nM) by  $\beta$ A peptides (10  $\mu$ M). Experiments were carried out in replicates ( $n = 2$ ), error bars reported as standard error (SE).

#### 4. Docking supporting figures

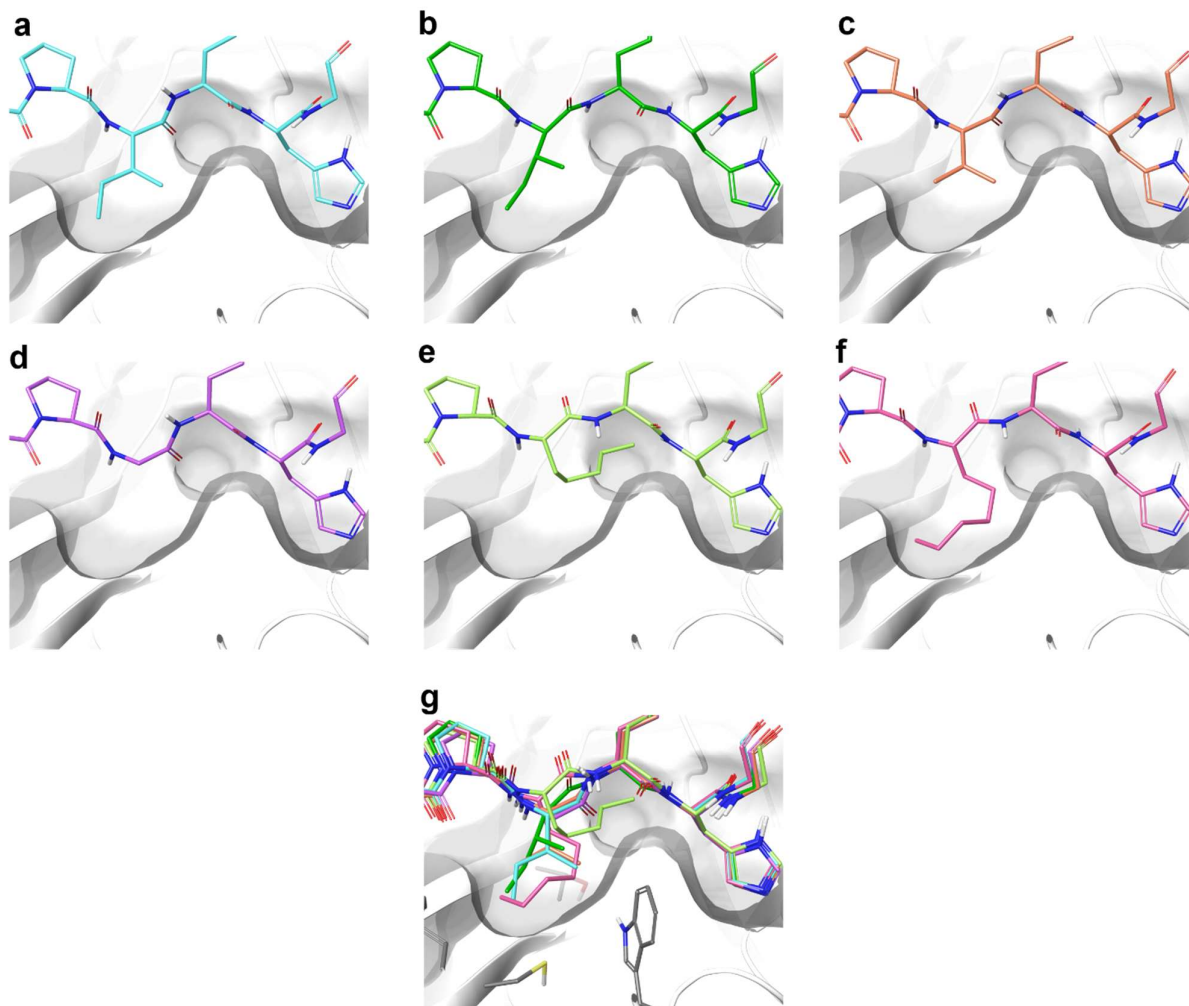

**Fig. S23** Docking poses of a selection of  $\beta$ A peptides. a)  $\beta$ A-Ile71, b)  $\beta$ A-D-Ile71, c)  $\beta$ A-Val71, d)  $\beta$ A-Gly71, e)  $\beta$ A-Ahp71, f)  $\beta$ A-Aoc71, g) a-f superimposed.

## 5. MD supporting figures

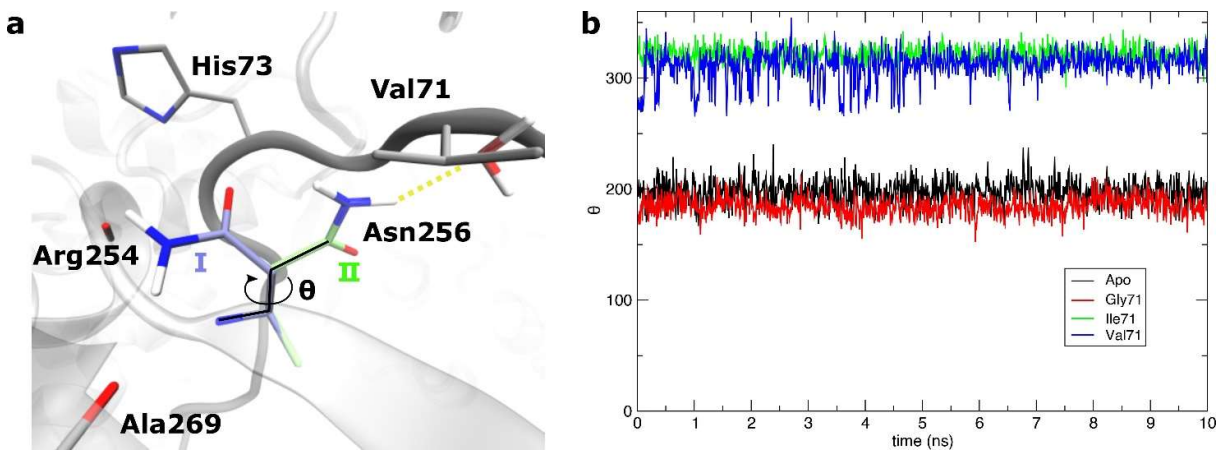

**Fig. S24** Conformation of Asn256 during the MD simulations. a) Asn256 changes from (I) to (II) during MD simulation of SETD3 bound to  $\beta$ A-Gly71 and in the unbound (apo) simulation. The yellow dotted line marks a hydrogen bond between Asn256 and water in the simulation of  $\beta$ A-Gly71. b) Plot of the dihedral angle ( $\theta$ ) during the MD simulations.
